# Supplementary material
Source: PubMed Central journal article supplement (PMC3562396)
Supplement: NIHMS417509-supplement-335_2012_9436_MOESM1_ESM.pdf [file NIHMS417509-supplement-335_2012_9436_MOESM1_ESM.pdf]

## Supplementary Figure Legends

**Supplementary Figure S1. The BAC-Tg *RCAN1* gene is expressed in a pattern similar to though not identical to the endogenous mouse *Rcan1* gene.**

Northern blotting showing the expression pattern of transgenic *RCAN1* mRNA in adult tissues from the middle copy number *RCAN1*<sup>BAC-Tg2</sup> mice. Duplicate blots were hybridized with human *RCAN1* and mouse *Rcan1* probes. Similar results for tissue-specific expression were obtained for the other two BAC-Tg lines (data not shown). EtBr, ethidium bromide–stained images of the northern gels showing 28S and 18S rRNA bands as a control for approximately equal loading of the lanes. Br: brain; Ht: heart; Lu :lung; Li: liver; Sp: spleen; Ki: kidney; Mu: muscle.

**Supplementary Figure S2. Western blot analysis confirming epitope-tagged human *RCAN1* protein expression in brain, heart and thymus tissues from the lowest copy number BAC-Tg line.**

Total proteins were prepared from both transgenic and wild type tissues and blotted with HA antibody to recognize the tagged human *RCAN1* protein. Both major isoforms *RCAN1* are seen in brain, thymus and heart. The Coomassie-blue stain is shown as a control for equal loading.

**Supplementary Figure S3. Luciferase reporter assays show a mild effect of LOC73419 on a CaN-responsive promoter.**

Jurkat cell were transfected with 400 ng of pIL2-FF-luciferase plasmid and 200 ng pTK-RN-luciferase and increasing amounts of LOC73419 plasmid DNA. Twenty four hours later the

cells were stimulated with PMA (10 ng/ml) and ionomycin (1 $\mu$ M) for 8 hours followed by luciferase assays.

**Supplementary Figure S4. Human RCAN1 produced from the BAC-Tg enhances CaN activity in the RCAN1 protein complex *in vitro*.**

Transgenic mouse brain lysate was first incubated with anti-CaN antibody, and then equal amounts of the lysate were incubated with protein A/G-agarose or anti-HA-agarose beads, respectively, to pull down total CaN or RCAN1-bound CaN. The beads were washed and applied to the CaN phosphatase assay. The CaN amount bound to the beads was determined by western blotting.

**Supplementary Figure S5. RCAN1 enhances NFATc1 expression in BAC-Tg MEFs after thapsigargin treatment.**

MEFs were treated with thapsigargin (100nM, 3 hours) to release Ca<sup>++</sup> from intracellular stores. NFATc1 western blotting reveals increased expression of this protein in the BAC-Tg MEFs, providing further evidence that the tandem-tagged RCAN1 construct is biologically active. The anti-HA blots show that expression of the short isoform of the transgenic HA-tagged RCAN1 is induced by thapsigargin.

**Supplementary Figure S6. Verification of deletion of the floxed Tp53 exon 7 in the mammary adenocarcinomas that form both in the presence and absence of the RCAN1 BAC-Tg.**

PCR of genomic DNA from the tumors, and from control mouse tail DNA, using primers flanking the *Tp53* CKO allele reveals the expected strong recombined band in all tumors, regardless of the presence or absence of the *RCAN1* Tg. There is a modest but reproducible

relative increase in intensity of the non-recombined  $p53^{\text{flex7}}$  band in the  $p53^{\text{flex7}}:RCAN1^{\text{Tg}}$  tumors, suggesting that these tumors may have slightly more stromal cells (*Tp53*-wild type) than the mammary tumors which formed in the absence of the *RCAN1* Tg.

Suppl. Fig. S1

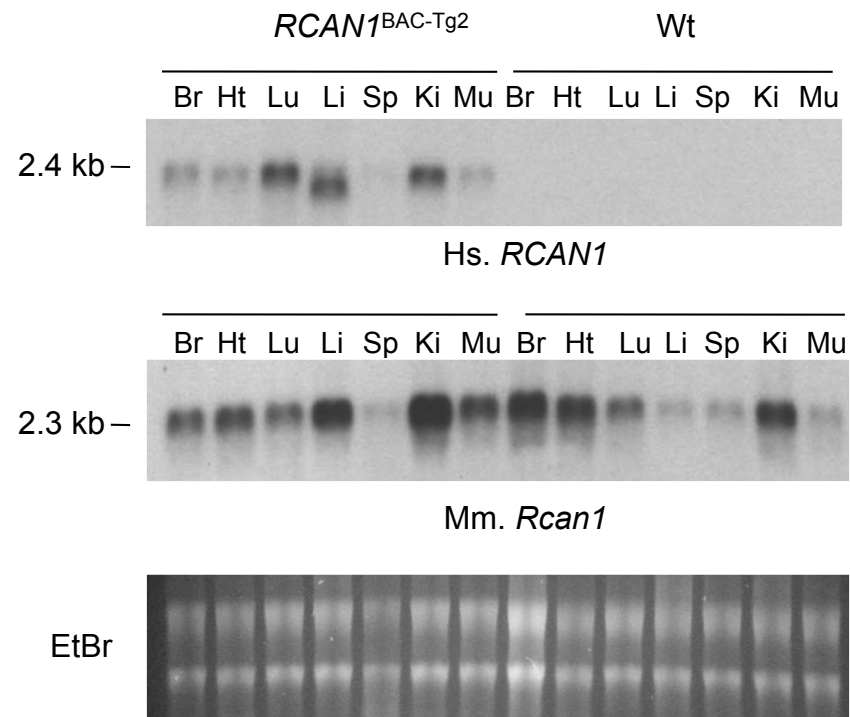

Suppl. Fig. S2

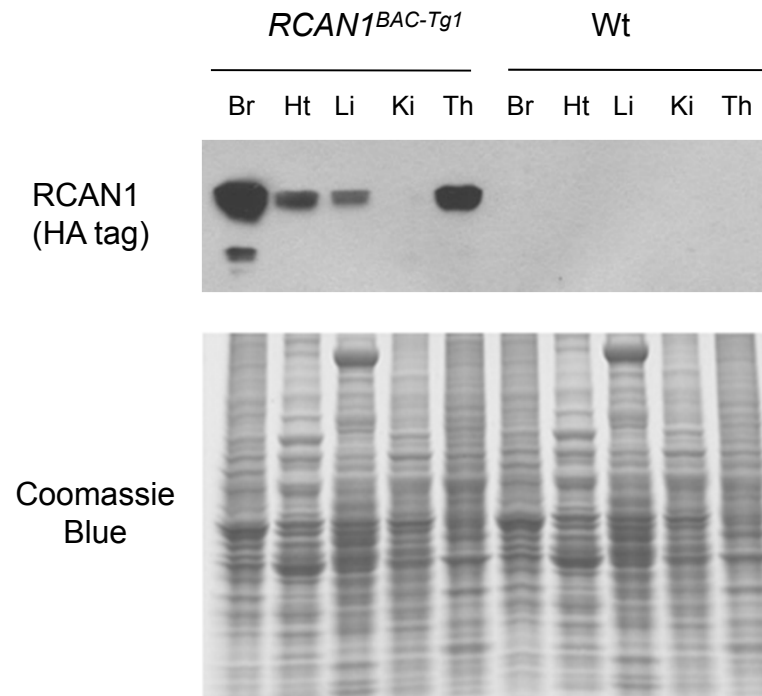

Suppl. Fig. S3

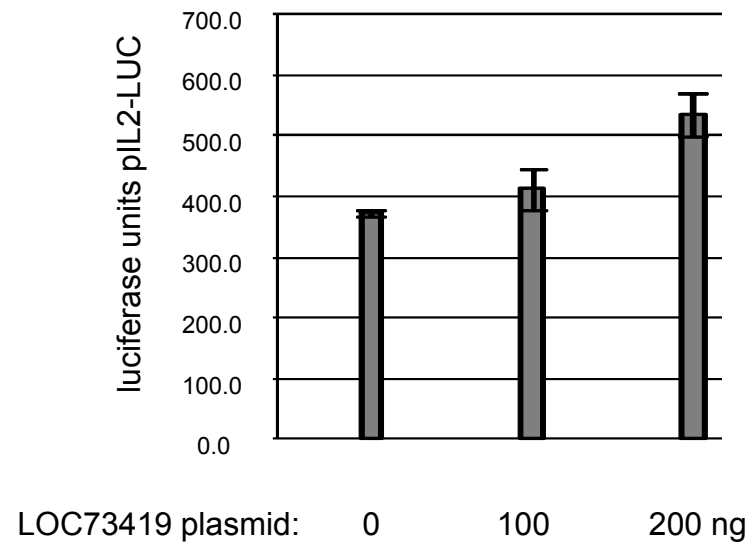

Suppl. Fig. S4

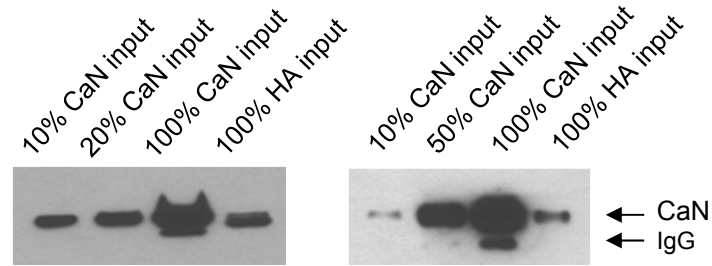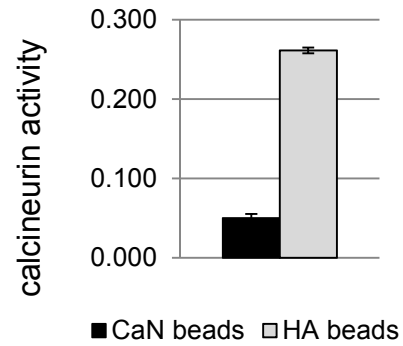

| O.D. 620nm           | CaN IP          | HA IP           |
|----------------------|-----------------|-----------------|
| Total activity       | 0.159           | 0.380           |
| Total activity       | 0.152           | 0.373           |
| Total activity       | 0.162           | 0.377           |
| Activity (with EGTA) | 0.108           | 0.116           |
| CaN activity         | 0.050 (" 0.005) | 0.261 (" 0.004) |

Suppl. Fig. S5

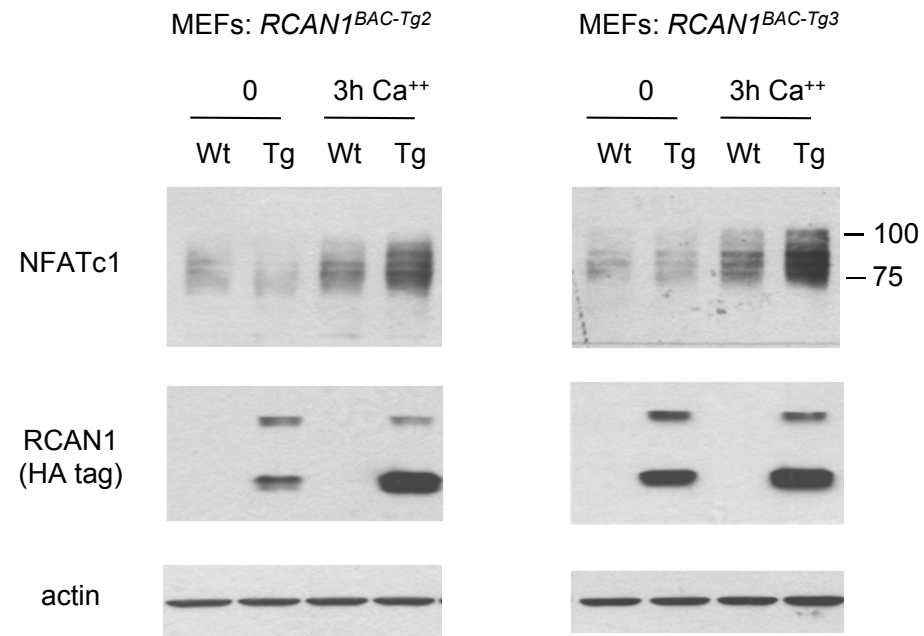



Suppl. Fig. S6

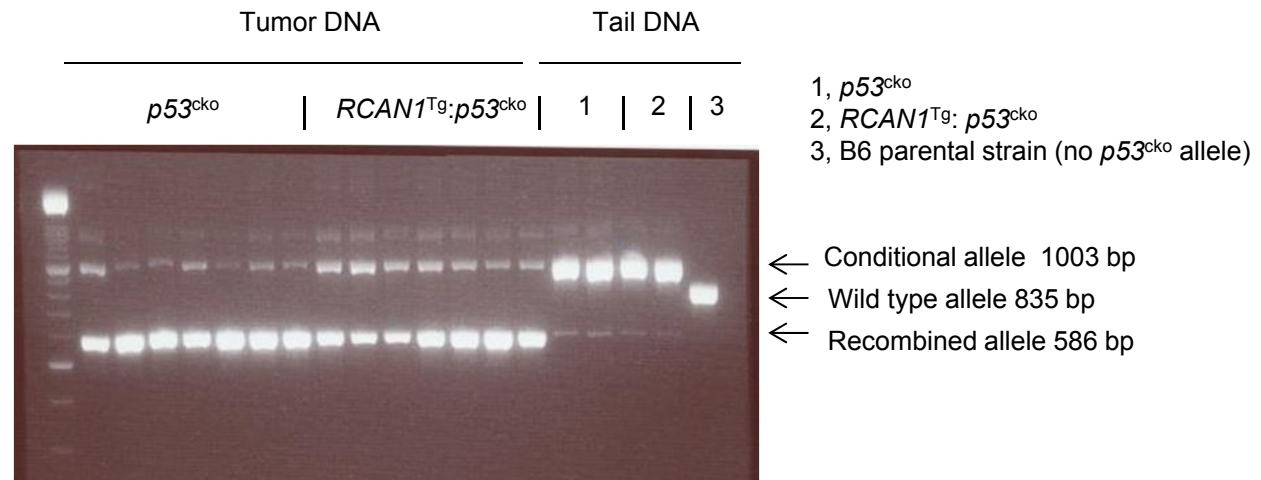

Genomic DNA PCR with primers flanking the *p53*<sup>flex7/flex7</sup> conditional KO allele
